# Supplementary material for: Nested Keplerian architecture of [Cu58H20(SPr)36(PPh3)8]2+ nanoclusters
Source: Royal Society of Chemistry journal article supplement (doi:10.1039/d3cc01811c), 2023-01-01
Supplement: d3cc01811c1.pdf [file d3cc01811c1.pdf]

## **Supporting Information**

### **Nested Keplerian architecture of $[\text{Cu}_{58}\text{H}_{20}(\text{SPr})_{36}(\text{PPh}_3)_8]^{2+}$ nanocluster**

Sourav Biswas,<sup>a</sup> Sakiat Hossian,<sup>a</sup> Taiga Kosaka,<sup>a</sup> Jin Sakai,<sup>a</sup> Daichi Arima,<sup>b</sup> Yoshiki Niihori,<sup>a</sup> Masaaki Mitsui,<sup>b</sup> De-en Jiang,<sup>c</sup> Saikat Das,<sup>\*a</sup> Song Wang,<sup>\*d</sup> and Yuichi Negishi<sup>\*a</sup>

<sup>a</sup>Department of Applied Chemistry, Faculty of Science, Tokyo University of Science, Kagurazaka, Shinjuku-ku, Tokyo 162-8601, Japan. E-mail: saikatdas@rs.tus.ac.jp, negishi@rs.tus.ac.jp

<sup>b</sup>Department of Chemistry, College of Science, Rikkyo University, Toshima-ku, Tokyo 171-8501, Japan.

<sup>c</sup>Department of Chemical and Biomolecular Engineering and Department of Chemistry, Vanderbilt University, Nashville, TN 37235, USA.

<sup>d</sup>Hefei National Research Center for Physical Sciences at the Microscale, School of Chemistry and Materials Science, University of Science and Technology of China, Hefei, Anhui 230026, People's Republic of China. E-mail: wsong09@ustc.edu.cn

## Table of contents

| Name     | Description                                                                                    | Page No. |
|----------|------------------------------------------------------------------------------------------------|----------|
|          | Experimental section                                                                           | S3-S7    |
| Table S1 | Crystal data and structure refinement parameters and other details                             | S8-S10   |
| Table S2 | Average bond lengths between Cu-Cu                                                             | S11      |
| Table S3 | Other bond length details                                                                      | S12-S13  |
| Table S4 | Probability chart of hydride occupancy from CNN                                                | S14      |
| Table S5 | Bader charge distribution                                                                      | S15-S16  |
| Table S6 | Parameters obtained from TCSPC measurement                                                     | S17      |
| Fig. S1  | SEM and optical microscope image of Cu <sub>58</sub> NC crystal                                | S18      |
| Fig. S2  | Thermal ellipsoid (50%) of all atoms presents in Cu <sub>58</sub> NC through SCXRD measurement | S19      |
| Fig. S3  | Symmetry elements of Cu <sub>58</sub> NC.                                                      | S20      |
| Fig. S4  | Connections and among the layers of Cu atoms and their positions in Cu <sub>58</sub> NC        | S21      |
| Fig. S5  | Bridging among the shell layers in Cu <sub>58</sub> NC                                         | S22      |
| Fig. S6  | ESI mass spectrum of Cu <sub>58</sub> D nanocluster                                            | S23      |
| Fig. S7  | Optimized structure of Cu <sub>58</sub> NC                                                     | S24      |
| Fig. S8  | Probability of hydride occupancy in Cu <sub>58</sub> NC                                        | S25      |
| Fig. S9  | Position of hydrides inside the Cu <sub>58</sub> NC and their bridging mode                    | S26      |
| Fig. S10 | Arrangement of hydrides inside the Cu <sub>58</sub> NC as anion shells                         | S27      |
| Fig. S11 | TCSPC Lifetime of the emission of Cu <sub>58</sub> NC in CHCl <sub>3</sub> solution            | S28      |
|          | References                                                                                     | S29      |

## Experimental

### Materials

Tetrakis(acetonitrile)copper(I) tetrafluoroborate  $\text{Cu}(\text{CH}_3\text{CN})_4(\text{BF}_4)$ , triphenylphosphine ( $\text{PPh}_3$ ), 1-propanethiol ( $\text{HSPr}$ ), sodium borohydride ( $\text{NaBH}_4$ ), sodium borodeuteride ( $\text{NaBD}_4$ ) were procured from Sigma-Aldrich. HPLC grade solvents- chloroform, methanol, acetonitrile, and n-hexane were purchased from Tokyo Chemical Industry Co., Ltd.

### Synthesis of $\text{Cu}_{58}$ nanocluster

Initially, 50 mg (0.16 mmol) of  $\text{Cu}(\text{CH}_3\text{CN})_4\text{BF}_4$  and 50 mg (0.19 mmol) of  $\text{PPh}_3$  were dissolved in the mixture solution of 2 mL acetonitrile and 0.5 mL chloroform at room temperature which produced a colorless solution. After 5 min of stirring, 14  $\mu\text{L}$  (0.12 mmol) of  $\text{HSPr}$  was added to the reaction mixture and continued stirring. After that 50 mg (1.32 mmol)  $\text{NaBH}_4$  dissolved in 2.5 mL methanol, was added into mixture drop-wise under maintain the whole temperature of the reaction at 5-10  $^\circ\text{C}$  and the color of the solution becomes red from colorless. The reaction was kept for another 1 hour under continuous stirring. After completion, the reaction mixture was centrifuged, and collected the red precipitate. After drying properly, the precipitate was dissolved in the solvent mixture of chloroform/hexane (volume ratio 1:1). The final clear solution was kept for crystallization at ambient conditions. After 10 days, red-colored box-shaped crystals were obtained.

### Synthesis of $\text{Cu}_{58}\text{D}$ nanocluster

The same procedure was adopted whatever was mentioned for the synthesis of the  $\text{Cu}_{58}$  NC. Instead of  $\text{NaBH}_4$ , we have used  $\text{NaBD}_4$  as a reducing agent.

### X-ray Crystallography details

A single crystal was immersed in the cryoprotectant Parabar 10312 (Hampton Research, 34 Journey, Aliso Viejo, CA 92656-3317 USA) and kept at 90 K during diffraction data collection. A Bruker D8 QUEST diffractometer was used to collect the diffraction data for the single crystal using monochromated  $\text{Mo K}\alpha$  radiation ( $\lambda = 0.71073 \text{ \AA}$ ). Although many crystals from different batches were checked for the diffraction experiment, all of them lacked higher angle

data. However, the collected diffraction data was good enough to obtain a preliminary structure containing Cu(I) ions, S, P, and a few C atoms, which was solved by SHELXT<sup>S1</sup> using the intrinsic phasing method in Apex3 Bruker Software Suite.<sup>S2</sup> Later, during refinement the full crystal structure was completed using the full-matrix least squares method against F<sup>2</sup> by SHELXL-2018/3 in Olex2 GUI<sup>S3</sup> All the atoms including propylthiolates, *n*-hexane solvent, and one [BF<sub>4</sub>]<sup>-</sup> anion were refined anisotropically. We faced challenges modelling the second [BF<sub>4</sub>]<sup>-</sup> anion, which is situated on a complex special symmetry position where corresponding q peaks are located on both 3-fold and 6-fold special symmetry positions. However, we have deliberately left the electron q-peaks unmasked to provide readers a clearer understanding of the total structure (even though cif file will not directly show q peaks). A few disordered phenyl rings were fixed by AFIX 66. Although Cu<sub>58</sub> NC has twenty hydrides (H<sup>-</sup>), which were confirmed by ESI-MS and theoretical calculations, they could not be assigned and refined stably.

Although few check cif alerts are there, we have provided a comprehensive response as follows

#### # start Validation Reply Form

```

_vrf_THETM01_Cu58
;
PROBLEM: The value of sine(theta_max)/wavelength is less than 0.550.
RESPONSE: Despite our persistent efforts, we were unable to obtain a new data set with a higher
resolution than 1.2 Å. This limitation can be attributed to the inherent weak diffracting
ability of the Cu58 cluster.
;
_vrf_DIFMX02_Cu58
;
PROBLEM: The maximum difference density is > 0.1*ZMAX*0.75.
RESPONSE: The highest electron density, measuring 2.92, corresponds to the disordered second
[BF4]- anion. Due to its placement in a complex special symmetry position involving both 3-fold
and 6-fold symmetry positions, we encountered difficulties in accurately modeling this
component. As a result, it remains unresolved in the structure.
;
_vrf_PLAT029_Cu58
;
PROBLEM: _diffrn_measured_fraction_theta_full value Low .      0.919 Why?
RESPONSE: During the initial data collection, the unit cell and space group exhibited higher
symmetry, specifically cubic symmetry, compared to the final space group and symmetry in which
the data was ultimately solved and refined. Consequently, the completeness of the data was less
than 100% due to this change.
Regrettably, despite our extensive efforts spanning over six months, both before the first
communication and during the review stage, we could not achieve a resolution improvement beyond
1.20 Å for any of the subsequent data sets. Therefore, the only enhancement we could make was
in the completeness of the initial data set, which increased from 89% to 92% by incorporating
all the reflection frames.
;
_vrf_PLAT307_Cu58
;
PROBLEM: Isolated Metal Atom found in Structure (Unusual)      Cu02 Check.
RESPONSE: Each of these copper ion (Cu02, Cu04) in our structure forms bonds with four hydride
atoms. However, these hydrides were not assigned and refined crystallographically. Therefore,
these alerts are generated by those isolated Cu ions. Nonetheless, we were able to predict their
presence using ESI-MS (Electrospray Ionization Mass Spectrometry) and locate them through DFT
(Density Functional Theory) calculations. The combination of experimental and computational
methods allowed us to confirm the existence of the hydride atoms associated with those copper
ions. Therefore, they are not isolated.

```

```

;
_vrf_PLAT097_Cu58
;
PROBLEM: Large Reported Max. (Positive) Residual Density      2.93 eA-3.
RESPONSE: We believe that the highest electron density, measuring 2.92, corresponds to the
disordered second [BF4]- anion. Unfortunately, this anion could not be accurately modeled due
to its presence in both a 3-fold and 6-fold special symmetry position. As a result, the precise
structural representation of this component remains unresolved.
;
_vrf_PLAT341_Cu58
;
PROBLEM: Low Bond Precision on C-C Bonds ..... 0.03056 Ang.
RESPONSE: The structure consists of a notable presence of 36 carbon chains, specifically propyl
thiolates. These chains inherently exhibit higher thermal parameters and disorder, which
consequently lower the precision of the C-C bonds within them. It is important to acknowledge
this characteristic when considering the structural analysis of the propyl thiolate chains.
;
_vrf_PLAT601_Cu58
;
PROBLEM: Unit Cell Contains Solvent Accessible VOIDS of .      104 Ang**3.
RESPONSE: We believe that this particular region of the structure comprises a disordered second
[BF4]- ion. Unfortunately, this ion could not be accurately modeled due to its challenging
placement on a complex special symmetry position involving both 3-fold and 6-fold symmetry
elements. As a result, the precise modeling of this ion within the structure was not possible.
However, we did not mask to show readers that Cu58 cluster, indeed, has two [BF4]- anions.
;
_vrf_DIFMX02_ALERT_1_C
;
PROBLEM: The maximum difference density is > 0.1*ZMAX*0.75 The relevant atom site should be
identified.
RESPONSE: The highest electron density, measuring 2.92, corresponds to the disordered second
[BF4]- anion. As it is located in a complex special symmetry position involving both 3-fold and
6-fold symmetry positions, we encountered difficulties in accurately modeling this component.
As a result, it remains unresolved in the structure.
;
_vrf_PLAT041_ALERT_1_C
;
PROBLEM: Calc. and Reported SumFormula Strings Differ Please Check.
RESPONSE: [BF4]- anion has a 3 fold symmetry whereas Cu58 cluster has a 6 fold symmetry, as a
result, asymmetric unit of the crystal contains 1/6 of the Cu58 cluster and 1/3 of [BF4]- anion.
Therefore, when SumFormula is calculated, it shows one additional [BF4]- anion.
;
_vrf_PLAT042_ALERT_1_C
;
PROBLEM: Calc. and Reported MoietyFormula Strings Differ Please Check.
RESPONSE: [BF4]- anion has a 3 fold symmetry whereas Cu58 cluster has a 6 fold symmetry, as a
result, asymmetric unit of the crystal contains 1/6 of the Cu58 cluster and 1/3 of [BF4]- anion.
Therefore, when MoietyFormula is calculated, it shows one additional [BF4]- anion.
;
_vrf_PLAT043_ALERT_1_C
;
PROBLEM: Calculated and Reported Mol. Weight Differ by .. 86.74 Check.
RESPONSE: [BF4]- anion has a 3 fold symmetry whereas Cu58 cluster has a 6 fold symmetry, as a
result, asymmetric unit of the crystal contains 1/6 of the Cu58 cluster and 1/3 of [BF4]- anion.
Therefore, when Mol. Weight is calculated, it shows one additional [BF4]- anion.
;
_vrf_PLAT094_ALERT_2_C
PROBLEM: Ratio of Maximum / Minimum Residual Density .... 2.31 Report.
RESPONSE: An electron density peak measuring 2.92 has intentionally been left unassigned to
illustrate the presence of the unresolved disordered second [BF4]- ion. Consequently, this
decision contributes to a higher ratio of residual density within the structure. The purpose of
highlighting this unassigned peak is to convey the existence of the disordered [BF4]- anion
could not be modeled.
;
_vrf_PLAT220_ALERT_2_C
;
PROBLEM: NonSolvent Resd 1 C Ueq(max)/Ueq(min) Range 3.8 Ratio.
RESPONSE: This is part of carbon chain of propyl thiolates or hexane solvent of the crystal.
PLAT222_ALERT_3_C NonSolvent Resd 1 H Uiso(max)/Uiso(min) Range 4.7 Ratio Author Response:
Presence of high thermal carbon atoms making the attached -H with higher
Uiso(max)/Uiso(min) range.
;
_vrf_PLAT241_ALERT_2_C
;
PROBLEM: High 'MainMol' Ueq as Compared to Neighbors of C35 Check.

```

```

RESPONSE: C35 is a part of phenyl ring of a PPh3 ligand, and this carbon atom is bonded to C25
which is directly bonded to P of PPh3 ligand and has normal thermal parameters. As a result,
C35 exhibits higher relative thermal parameters compared to its neighboring carbon atoms.
;
PLAT242_ALERT_2_C
;
PROBLEM: Low 'MainMol' Ueq as Compared to Neighbors of C13 Check.
RESPONSE: C13 is the middle carbon of a propylthiolate ligand, and this carbon is bonded with
terminal carbon C37 of same propylthiolate ligand which has higher thermal parameter. This is
the reason this alert was generated.
;
_vrf_PLAT242_ALERT_2_C
;
PROBLEM: Low 'MainMol' Ueq as Compared to Neighbors of C26 Check.
RESPONSE: C13 is the middle carbon of a propylthiolate ligand, and this carbon is bonded with
terminal carbon C37 of same propylthiolate ligand which has higher thermal parameter. This is
the reason this alert was generated.
;
_vrf_PLAT250_ALERT_2_C
;
PROBLEM: Large U3/U1 Ratio for Average U(i,j) Tensor .... 2.6 Note.
RESPONSE: Few atoms of chain like propyl thiolates and a n-hexane solvent have higher thermal
parameters.
;
_vrf_PLAT260_ALERT_2_C
;
PROBLEM: Large Average Ueq of Residue Including F1 0.261 Check.
RESPONSE: It is part of the [BF4]- anion with higher thermal parameters.
;
_vrf_PLAT413_ALERT_2_C
;
PROBLEM: Short Inter XH3 .. XHn H33 ..H41C . 2.01 Ang. -2/3+y,2/3-x+y,5/3-z = 17_456 Check.
RESPONSE: Attached carbon atom of a propylthiolate chain has higher thermal parameters, as a
result, refinement of the H, especially direction, may be not perfect, consequently, two H atoms
of two different cluster come closer.
;
# end Validation Reply Form

```

## Computational details

A deep-learning model<sup>S4</sup> was used to predict hydride sites in copper cluster. This convolutional neural network takes the heavy-atom coordinates of the cluster obtained from the single-crystal X-ray diffraction as input and predicts the occupancy for each potential hydride site in the cluster. The details of the Cu-H neural network can be found in previous studies.<sup>S4,S5</sup> In this work, the X-ray structures of  $[\text{Cu}_{58}\text{H}_{20}(\text{SCH}_2\text{CH}_2\text{CH}_3)_{36}(\text{PPh}_3)_8]^{2+}$  (i.e., the coordinates of Cu, C, P, and S in the cluster) were used as input. The model predicted that there are 20 highly probable hydride sites, which are consistent with the hydride number obtained from the experimental measurements. To validate the prediction, DFT calculation was performed by using the Vienna ab initio simulation package (VASP) software. The Perdew–Burke–Ernzerhof (PBE) form of the generalized-gradient approximation (GGA) was used for electron exchange and correlation.<sup>S6</sup> The projector-augmented-wave (PAW) method<sup>S7</sup> was used to describe the electron-core interaction with the cutoff energy of 450 eV for the planewave bases.

## Instrumentation

UV-Vis absorption spectra were obtained with a JASCO V-670 UV-VIS-NIR spectrophotometer. Fluorescence measurements were conducted at room temperature with a linearly polarized continuous wave (cw) 405MDLC (SUNSHINE) diode laser as an excitation source and the spectra was recorded using a SpectraPro 2300i polychromator coupled with a liquid-nitrogen-cooled charge coupled device camera (Spec-10:100B/LN, Roper Scientific). The lifetime of the emission was measured by synchronize of laser and avalanche photodiode (APD, SPCM-AQRH-61, Perkin-Elmer), which were fed to the time-correlated single photon counting (TC-SPC) card (TimeHarp 260, PicoQuant) operating in time-tagged and time-resolved modes. Recording and analysis of data were performed using the SymPhoTime 64 (PicoQuant) software. The Fluorolog-3 spectrofluorimeter was utilized to establish the relative quantum yield. This determination involved finding the optimal excitation wavelength, which closely matched with  $[\text{Ru}(\text{bipyridine})_3]\text{Cl}_2$ . The concentration of the solutions was standardized by adjusting the absorption to 0.05 OD, and the quantum yield measurement was conducted under room temperature condition. Scanning electron microscopy (SEM) images were recorded using JEOL JSM-7000FSHL field emission scanning electron microscope. Electrospray ionization mass spectrometry was performed using a reflectron-type time of flight MS system (Bruker, microTOF II). The NCs were dissolved in a mixture of chloroform and acetonitrile. The isotope distribution was calculated using an isotope pattern simulator (JEOL, Isotope Pattern Simulator).

**Table S1.** Crystal data and structure refinement parameters.

| Table 1 Crystal data and structure refinement for Cu <sub>58</sub> . |                                                                                                   |
|----------------------------------------------------------------------|---------------------------------------------------------------------------------------------------|
| Identification code                                                  | Cu <sub>58</sub>                                                                                  |
| Empirical formula                                                    | C <sub>270</sub> H <sub>414</sub> BCu <sub>58</sub> F <sub>4</sub> P <sub>8</sub> S <sub>36</sub> |
| CCDC no                                                              | 2255364                                                                                           |
| Formula weight                                                       | 8834.71                                                                                           |
| Temperature/K                                                        | 90.15                                                                                             |
| Crystal system                                                       | trigonal                                                                                          |
| Space group                                                          | R-3                                                                                               |
| a/Å                                                                  | 23.3990(7)                                                                                        |
| b/Å                                                                  | 23.3990(7)                                                                                        |
| c/Å                                                                  | 57.171(4)                                                                                         |
| $\alpha/^\circ$                                                      | 90                                                                                                |
| $\beta/^\circ$                                                       | 90                                                                                                |
| $\gamma/^\circ$                                                      | 120                                                                                               |
| Volume/Å <sup>3</sup>                                                | 27108(3)                                                                                          |
| Z                                                                    | 3                                                                                                 |
| $\rho_{\text{calc}}/\text{cm}^3$                                     | 1.639                                                                                             |
| $\mu/\text{mm}^{-1}$                                                 | 3.615                                                                                             |
| F(000)                                                               | 13482.0                                                                                           |
| Crystal size/mm <sup>3</sup>                                         | 0.6 × 0.6 × 0.4                                                                                   |
| Radiation                                                            | MoK $\alpha$ ( $\lambda$ = 0.71073)                                                               |
| 2 $\theta$ range for data collection/ $^\circ$                       | 4.082 to 41.62                                                                                    |
| Index ranges                                                         | -20 ≤ h ≤ 23, -23 ≤ k ≤ 23, -31 ≤ l ≤ 55                                                          |
| Reflections collected                                                | 14513                                                                                             |
| Independent reflections                                              | 5187 [ $R_{\text{int}}$ = 0.0539, $R_{\text{sigma}}$ = 0.0830]                                    |
| Data/restraints/parameters                                           | 5817/485/609                                                                                      |
| Goodness-of-fit on F <sup>2</sup>                                    | 1.064                                                                                             |
| Final R indexes [ $I \geq 2\sigma(I)$ ]                              | $R_1$ = 0.0587, $wR_2$ = 0.1671                                                                   |
| Final R indexes [all data]                                           | $R_1$ = 0.1114, $wR_2$ = 0.2027                                                                   |
| Largest diff. peak/hole / e Å <sup>-3</sup>                          | 2.93/-1.27                                                                                        |

## Additional Information on Crystal Analysis:

## Details:

## 1. Fixed Uiso

At 1.2 times of:

All C (H) groups, All C (H, H) groups

At 1.5 times of:

All C (H, H, H) groups

## 2. Restrained distances

F1-B1 = F2-B1

1.43 with sigma of 0.02

C25-C17

1.39 with sigma of 0.02

C16-C15 = C41-C15

1.53 with sigma of 0.02

### 3. Uiso/Uaniso restraints and constraints

$C1 \approx C15 \approx C48 \approx C4 \approx C9 \approx C6 \approx C27 \approx C8 \approx C2$

$\approx C10 \approx C12 \approx C25 \approx C14 \approx C16 \approx C18 \approx C17 \approx C20$

$\approx C19 \approx C22 \approx C41 \approx C24 \approx C3 \approx C26 \approx C13 \approx C28$

$\approx C7 \approx C30 \approx C29 \approx C32 \approx C31 \approx C34 \approx C33 \approx C36$

$\approx C35 \approx C38 \approx C37 \approx C40 \approx C39 \approx C42 \approx C5 \approx C44$

$\approx C46$ : within 1.7Å with sigma of 0.04 and sigma for terminal atoms of 0.08

within 1.7Å

$C21 \approx C43 \approx C11 \approx C45 \approx C47 \approx C23$ : within 1.7Å with sigma

of 0.02 and sigma for terminal atoms of 0.04 within 1.7Å

### 4. Rigid body (RIGU) restrains

C1, C15, C48, C4, C9, C6, C27, C8, C2, C10, C12, C25, C14, C16, C18, C17, C20,  
C19, C22, C41, C24, C3, C26, C13, C28, C7, C30, C29, C32, C31, C34, C33, C36,  
C35, C38, C37, C40, C39, C42, C5, C44, C46

with sigma for 1-2 distances of 0.004 and sigma for 1-3 distances of 0.004

C21, C43, C11, C45, C23, C47

with sigma for 1-2 distances of 0.004 and sigma for 1-3 distances of 0.004

F1, F2, B1

with sigma for 1-2 distances of 0.004 and sigma for 1-3 distances of 0.004

### 5. Others

Fixed Sof: C21(0.5) H21A(0.5) H21B(0.5) H21C(0.5) C43(0.5) H43A(0.5)

H43B(0.5) C11(0.5) H11A(0.5) H11B(0.5) C45(0.5) H45A(0.5) H45B(0.5) C23(0.5)

H23A(0.5) H23B(0.5) H23C(0.5) C47(0.5) H47A(0.5) H47B(0.5)

### 6.a Secondary CH<sub>2</sub> refined with riding coordinates:

C1(H1A,H1B), C6(H6A,H6B), C8(H8A,H8B), C12(H12A,H12B), C14(H14A,H14B),

C16(H16A,H16B), C24(H24A,H24B), C26(H26A,H26B), C36(H36A,H36B),

C13(H13A,H13B), C7(H7A,H7B), C15(H15A,H15B), C43(H43A,H43B),

C11(H11A,H11B), C45(H45A,H45B), C47(H47A,H47B)

### 6.b Aromatic/amide H refined with riding coordinates:

C4(H4), C10(H10), C20(H20), C22(H22), C30(H30), C32(H32), C34(H34), C38(H38),

C42(H42), C48(H48), C3(H3), C27(H27), C29(H29), C31(H31), C33(H33), C17(H17),  
C35(H35), C9(H9), C19(H19), C39(H39)

6.c Idealised Me refined as rotating group:

C44(H44A,H44B,H44C), C46(H46A,H46B,H46C), C2(H2A,H2B,H2C), C37(H37A,H37B,  
H37C), C5(H5A,H5B,H5C), C41(H41A,H41B,H41C), C21(H21A,H21B,H21C),  
C23(H23A,H23B,H23C)

**Table S2.** Average bond lengths between Cu-Cu

| <b>Bond lengths<br/>(Å)</b> |                  |            | <b>Average bond lengths<br/>(Å)</b> |
|-----------------------------|------------------|------------|-------------------------------------|
| Cu4                         | Cu4 <sup>2</sup> | 2.658(3)   | 2.654±0.004                         |
| Cu4                         | Cu4 <sup>1</sup> | 2.658(3)   |                                     |
| Cu4                         | Cu8              | 2.650(3)   |                                     |
| Cu4                         | Cu7 <sup>3</sup> | 2.758(2)   | 2.748 ±0.009                        |
| Cu4                         | Cu7              | 2.751(2)   |                                     |
| Cu4                         | Cu7 <sup>1</sup> | 2.737(3)   |                                     |
| Cu8                         | Cu7              | 2.7552(16) |                                     |
| Cu8                         | Cu7 <sup>4</sup> | 2.7550(16) |                                     |
| Cu8                         | Cu3 <sup>4</sup> | 2.690(4)   | 2.703 ±0.017                        |
| Cu8                         | Cu3 <sup>3</sup> | 2.690(4)   |                                     |
| Cu8                         | Cu3              | 2.690(4)   |                                     |
| Cu4                         | Cu9 <sup>3</sup> | 2.732(3)   |                                     |
| Cu4                         | Cu5 <sup>1</sup> | 2.688(2)   |                                     |
| Cu4                         | Cu11             | 2.702(2)   |                                     |
| Cu7                         | Cu9              | 2.791(2)   | 2.771±0.030                         |
| Cu7                         | Cu5              | 2.719(3)   |                                     |
| Cu11                        | Cu7              | 2.783(2)   |                                     |
| Cu3                         | Cu7              | 2.719(3)   |                                     |
| Cu1                         | Cu11             | 2.740(3)   | 2.748±0.024                         |
| Cu1                         | Cu5              | 2.787(2)   |                                     |
| Cu6                         | Cu3              | 2.747(2)   |                                     |
| Cu6                         | Cu9              | 2.720(3)   |                                     |

**Table S3.** Other bond length details

|      |                  |           |      |                 |           |
|------|------------------|-----------|------|-----------------|-----------|
| S6   | C8               | 1.853(16) | C12  | C13             | 1.51(2)   |
| S3   | C12              | 1.825(16) | C14  | C26             | 1.51(2)   |
| Cu1  | S1 <sup>1</sup>  | 2.338(4)  | S2   | C16             | 1.856(16) |
| Cu1  | S4               | 2.223(4)  | S5   | C1              | 1.845(14) |
| Cu1  | S6               | 2.225(5)  | P1   | C18             | 1.81(2)   |
| P1   | C28              | 1.817(15) | C16  | C15             | 1.541(18) |
| P1   | C40              | 1.838(17) | C24  | C44             | 1.49(3)   |
| P2   | C25 <sup>3</sup> | 1.82(2)   | C26  | C2              | 1.54(3)   |
| P2   | C25 <sup>4</sup> | 1.82(2)   | C28  | C48             | 1.39(3)   |
| P2   | C25              | 1.82(2)   | C30  | C27             | 1.35(3)   |
| C1   | C7               | 1.50(3)   | C36  | C46             | 1.53(2)   |
| C4   | C10              | 1.40(2)   | C38  | C42             | 1.37(3)   |
| C4   | C40              | 1.40(2)   | C13  | C37             | 1.49(2)   |
| C6   | C36              | 1.533(19) | C7   | C5              | 1.53(3)   |
| C8   | C24              | 1.486(18) | C31  | C9              | 1.39(3)   |
| C10  | C38              | 1.32(2)   | C33  | C19             | 1.39(4)   |
| Cu6  | S3 <sup>4</sup>  | 2.345(4)  | C33  | C39             | 1.38(4)   |
| Cu6  | S2               | 2.225(4)  | C17  | C19             | 1.41(3)   |
| Cu6  | S5               | 2.227(5)  | C35  | C39             | 1.43(3)   |
| C18  | C34              | 1.34(3)   | C21  | C11             | 1.64(5)   |
| C18  | C3               | 1.43(2)   | C43  | C45             | 1.49(6)   |
| C20  | C40              | 1.365(19) | C20  | C42             | 1.42(3)   |
| C22  | C28              | 1.41(2)   | C22  | C30             | 1.40(2)   |
| Cu10 | S6 <sup>2</sup>  | 2.378(4)  | Cu10 | S4              | 2.398(5)  |
| Cu10 | P1               | 2.239(4)  | Cu10 | S2 <sup>1</sup> | 2.385(4)  |
| C32  | C48              | 1.38(2)   | C32  | C27             | 1.40(3)   |
| C34  | C29              | 1.44(3)   | Cu11 | S6              | 2.266(3)  |

|      |                 |           |     |     |           |
|------|-----------------|-----------|-----|-----|-----------|
| Cu11 | S3              | 2.265(5)  | C3  | C31 | 1.36(3)   |
| C25  | C17             | 1.405(18) | C25 | C35 | 1.40(3)   |
| Cu3  | S3              | 2.275(4)  | Cu3 | S5  | 2.253(5)  |
| C29  | C9              | 1.42(3)   | C15 | C41 | 1.496(17) |
| Cu7  | S1              | 2.438(4)  | Cu7 | S3  | 2.441(5)  |
| Cu2  | S5 <sup>3</sup> | 2.368(4)  | Cu2 | S5  | 2.368(4)  |
| Cu2  | S5 <sup>4</sup> | 2.368(4)  | Cu2 | P2  | 2.237(11) |
| C43  | C11             | 1.41(4)   | S4  | C6  | 1.844(15) |
| Cu9  | S1              | 2.263(4)  | F2  | B1  | 1.43(2)   |
| Cu9  | S2              | 2.264(5)  | C45 | C47 | 1.57(6)   |
| Cu5  | S1              | 2.276(4)  | C23 | C47 | 1.66(6)   |
| Cu5  | S4              | 2.251(4)  | F1  | B1  | 1.395(16) |
| S1   | C14             | 1.846(16) |     |     |           |

**Table S4.** Probability chart of hydride occupancy from CNN.

| Site Rank | Probability of H <sup>-</sup> occupancy from CNN | Cu <sub>58</sub> H <sub>20</sub> | Site Rank                             | Probability of H <sup>-</sup> occupancy from CNN | Cu <sub>58</sub> H <sub>20</sub> |
|-----------|--------------------------------------------------|----------------------------------|---------------------------------------|--------------------------------------------------|----------------------------------|
| 1         | 99.95%                                           | Yes                              | 12                                    | 99.26%                                           | Yes                              |
| 2         | 99.90%                                           | Yes                              | 13                                    | 99.15%                                           | Yes                              |
| 3         | 99.81%                                           | Yes                              | 14                                    | 99.09%                                           | Yes                              |
| 4         | 99.74%                                           | Yes                              | 15                                    | 98.54%                                           | Yes                              |
| 5         | 99.71%                                           | Yes                              | 16                                    | 97.76%                                           | Yes                              |
| 6         | 99.71%                                           | Yes                              | 17                                    | 97.51%                                           | Yes                              |
| 7         | 99.60%                                           | Yes                              | 18                                    | 97.46%                                           | Yes                              |
| 8         | 99.55%                                           | Yes                              | 19                                    | 96.13%                                           | No                               |
| 9         | 99.51%                                           | Yes                              | 20                                    | 95.68%                                           | Yes                              |
| 10        | 99.33%                                           | Yes                              | 21                                    | 93.03%                                           | Yes                              |
| 11        | 99.30%                                           | Yes                              | site 19 is the center of cluster core |                                                  |                                  |

**Table S5.** Bader charge distribution

| Index | element | x_frac  | y_frac  | z_frac  | x            | y            | z            | Bader charge |
|-------|---------|---------|---------|---------|--------------|--------------|--------------|--------------|
| Cu1   | Cu      | 0.43216 | 0.34617 | 0.57215 | 11.0200<br>8 | 8.82733<br>5 | 14.5898<br>3 | 0.384324     |
| Cu2   | Cu      | 0.35222 | 0.32116 | 0.51138 | 8.98161      | 8.18958      | 13.0401<br>9 | 0.384792     |
| Cu3   | Cu      | 0.67881 | 0.349   | 0.52088 | 17.3096<br>6 | 8.8995       | 13.2824<br>4 | 0.389532     |
| Cu4   | Cu      | 0.31554 | 0.66498 | 0.65475 | 8.04627      | 16.9569<br>9 | 16.6961<br>3 | 0.405158     |
| Cu5   | Cu      | 0.32787 | 0.6394  | 0.31802 | 8.36068<br>5 | 16.3047      | 8.10951      | 0.412294     |
| Cu6   | Cu      | 0.44864 | 0.54288 | 0.44575 | 11.4403<br>2 | 13.8434<br>4 | 11.3666<br>3 | 0.254576     |
| Cu7   | Cu      | 0.45722 | 0.4399  | 0.4535  | 11.6591<br>1 | 11.2174<br>5 | 11.5642<br>5 | 0.246992     |
| Cu8   | Cu      | 0.51417 | 0.37264 | 0.51267 | 13.1113<br>4 | 9.50232      | 13.0730<br>9 | 0.329116     |
| Cu9   | Cu      | 0.35972 | 0.4184  | 0.42239 | 9.17286      | 10.6692      | 10.7709<br>5 | 0.387633     |
| Cu10  | Cu      | 0.34989 | 0.54051 | 0.41338 | 8.92219<br>5 | 13.7830<br>1 | 10.5411<br>9 | 0.388331     |
| Cu11  | Cu      | 0.56035 | 0.44899 | 0.4564  | 14.2889<br>3 | 11.4492<br>5 | 11.6382      | 0.245529     |
| Cu12  | Cu      | 0.5567  | 0.45637 | 0.55966 | 14.1958<br>5 | 11.6374<br>4 | 14.2713<br>3 | 0.26304      |
| Cu13  | Cu      | 0.35375 | 0.42889 | 0.58388 | 9.02062<br>5 | 10.9367      | 14.8889<br>4 | 0.385153     |
| Cu14  | Cu      | 0.33249 | 0.49715 | 0.661   | 8.47849<br>5 | 12.6773<br>3 | 16.8555      | 0.386211     |
| Cu15  | Cu      | 0.5935  | 0.35974 | 0.58148 | 15.1342<br>5 | 9.17337      | 14.8277<br>4 | 0.387065     |
| Cu16  | Cu      | 0.34399 | 0.472   | 0.33504 | 8.77174<br>5 | 12.036       | 8.54352      | 0.384108     |
| Cu17  | Cu      | 0.34323 | 0.32974 | 0.67905 | 8.75236<br>5 | 8.40837      | 17.3157<br>8 | 0.410219     |
| Cu18  | Cu      | 0.37547 | 0.48833 | 0.49965 | 9.57448<br>5 | 12.4524<br>2 | 12.7410<br>8 | 0.325132     |
| Cu19  | Cu      | 0.43688 | 0.33771 | 0.45301 | 11.1404<br>4 | 8.61160<br>5 | 11.5517<br>6 | 0.384985     |
| Cu20  | Cu      | 0.67907 | 0.35868 | 0.68899 | 17.3162<br>9 | 9.14634      | 17.5692<br>5 | 0.415267     |
| Cu21  | Cu      | 0.59836 | 0.35083 | 0.4523  | 15.2581<br>8 | 8.94616<br>5 | 11.5336<br>5 | 0.386029     |
| Cu22  | Cu      | 0.34323 | 0.55593 | 0.57427 | 8.75236<br>5 | 14.1762<br>2 | 14.6438<br>9 | 0.386978     |
| Cu23  | Cu      | 0.6619  | 0.44726 | 0.43067 | 16.8784<br>5 | 11.4051<br>3 | 10.9820<br>9 | 0.384689     |
| Cu24  | Cu      | 0.67342 | 0.5018  | 0.34317 | 17.1722<br>1 | 12.7959      | 8.75083<br>5 | 0.381934     |
| Cu25  | Cu      | 0.66268 | 0.52567 | 0.66982 | 16.8983<br>4 | 13.4045<br>9 | 17.0804<br>1 | 0.3936       |

|      |    |         |         |         |              |              |              |          |
|------|----|---------|---------|---------|--------------|--------------|--------------|----------|
| Cu26 | Cu | 0.35513 | 0.30352 | 0.34358 | 9.05581<br>5 | 7.73976      | 8.76129      | 0.412753 |
| Cu27 | Cu | 0.55184 | 0.55215 | 0.44843 | 14.0719<br>2 | 14.0798<br>3 | 11.4349<br>7 | 0.262423 |
| Cu28 | Cu | 0.63016 | 0.51071 | 0.50715 | 16.0690<br>8 | 13.0231<br>1 | 12.9323<br>3 | 0.322479 |
| Cu29 | Cu | 0.56387 | 0.57462 | 0.34688 | 14.3786<br>9 | 14.6528<br>1 | 8.84544      | 0.385583 |
| Cu30 | Cu | 0.44119 | 0.56365 | 0.34408 | 11.2503<br>5 | 14.3730<br>8 | 8.77404      | 0.384351 |
| Cu31 | Cu | 0.54825 | 0.5595  | 0.55169 | 13.9803<br>8 | 14.2672<br>5 | 14.0681      | 0.259561 |
| Cu32 | Cu | 0.57795 | 0.4137  | 0.35944 | 14.7377<br>3 | 10.5493<br>5 | 9.16572      | 0.385475 |
| Cu33 | Cu | 0.52276 | 0.32501 | 0.35041 | 13.3303<br>8 | 8.28775<br>5 | 8.93545<br>5 | 0.385707 |
| Cu34 | Cu | 0.65741 | 0.45423 | 0.59276 | 16.7639<br>6 | 11.5828<br>7 | 15.1153<br>8 | 0.390406 |
| Cu35 | Cu | 0.49632 | 0.65037 | 0.32538 | 12.6561<br>6 | 16.5844<br>4 | 8.29719      | 0.38666  |
| Cu36 | Cu | 0.69146 | 0.33478 | 0.35244 | 17.6322<br>3 | 8.53689      | 8.98722      | 0.406525 |
| Cu37 | Cu | 0.50764 | 0.48998 | 0.37557 | 12.9448<br>2 | 12.4944<br>9 | 9.57703<br>5 | 0.322858 |
| Cu38 | Cu | 0.65175 | 0.56622 | 0.42189 | 16.6196<br>3 | 14.4386<br>1 | 10.7582      | 0.381362 |
| Cu39 | Cu | 0.64618 | 0.58272 | 0.5832  | 16.4775<br>9 | 14.8593<br>6 | 14.8716      | 0.384761 |
| Cu40 | Cu | 0.4518  | 0.40272 | 0.35583 | 11.5209      | 10.2693<br>6 | 9.07366<br>5 | 0.384407 |
| Cu41 | Cu | 0.55114 | 0.59632 | 0.64954 | 14.0540<br>7 | 15.2061<br>6 | 16.5632<br>7 | 0.384349 |
| Cu42 | Cu | 0.4838  | 0.67512 | 0.65531 | 12.3369      | 17.2155<br>6 | 16.7104<br>1 | 0.386107 |
| Cu43 | Cu | 0.51144 | 0.34978 | 0.68049 | 13.0417<br>2 | 8.91939      | 17.3525      | 0.385974 |
| Cu44 | Cu | 0.66384 | 0.66919 | 0.32621 | 16.9279<br>2 | 17.0643<br>5 | 8.31835<br>5 | 0.413268 |
| Cu45 | Cu | 0.44479 | 0.55044 | 0.54892 | 11.3421<br>5 | 14.0362<br>2 | 13.9974<br>6 | 0.253106 |
| Cu46 | Cu | 0.49868 | 0.50831 | 0.63021 | 12.7163<br>4 | 12.9619<br>1 | 16.0703<br>6 | 0.329863 |
| Cu47 | Cu | 0.40664 | 0.64804 | 0.55135 | 10.3693<br>2 | 16.5250<br>2 | 14.0594<br>3 | 0.387665 |
| Cu48 | Cu | 0.41157 | 0.63858 | 0.42874 | 10.4950<br>4 | 16.2837<br>9 | 10.9328<br>7 | 0.380183 |
| Cu49 | Cu | 0.45332 | 0.44749 | 0.55694 | 11.5596<br>6 | 11.411       | 14.2019<br>7 | 0.2614   |
| Cu50 | Cu | 0.56806 | 0.66209 | 0.55633 | 14.4855<br>3 | 16.8833      | 14.1864<br>2 | 0.387488 |
| Cu51 | Cu | 0.65134 | 0.67815 | 0.49432 | 16.6091<br>7 | 17.2928<br>3 | 12.6051<br>6 | 0.387488 |
| Cu52 | Cu | 0.56828 | 0.43578 | 0.66258 | 14.4911<br>4 | 11.1123<br>9 | 16.8957<br>9 | 0.385125 |
| Cu53 | Cu | 0.32578 | 0.65006 | 0.48676 | 8.30739      | 16.5765      | 12.4123      | 0.383694 |

|      |    |         |         |         |                      |                      |                      |           |
|------|----|---------|---------|---------|----------------------|----------------------|----------------------|-----------|
|      |    |         |         |         |                      | 3                    | 8                    |           |
| Cu54 | Cu | 0.6503  | 0.69424 | 0.66256 | 16.5826 <sub>5</sub> | 17.7031 <sub>2</sub> | 16.8952 <sub>8</sub> | 0.414533  |
| Cu55 | Cu | 0.49234 | 0.6266  | 0.49333 | 12.5546 <sub>7</sub> | 15.9783              | 12.5799 <sub>2</sub> | 0.327123  |
| Cu56 | Cu | 0.4312  | 0.58581 | 0.64609 | 10.9956              | 14.9381 <sub>6</sub> | 16.4753              | 0.382442  |
| Cu57 | Cu | 0.44079 | 0.42452 | 0.6588  | 11.2401 <sub>5</sub> | 10.8252 <sub>6</sub> | 16.7994              | 0.386733  |
| Cu58 | Cu | 0.57255 | 0.65324 | 0.42927 | 14.6000 <sub>3</sub> | 16.6576 <sub>2</sub> | 10.9463 <sub>9</sub> | 0.385329  |
| H373 | H  | 0.5719  | 0.40514 | 0.51205 | 14.5834 <sub>5</sub> | 10.3310 <sub>7</sub> | 13.0572 <sub>8</sub> | -0.272176 |
| H374 | H  | 0.59079 | 0.59245 | 0.40652 | 15.0651 <sub>5</sub> | 15.1074 <sub>8</sub> | 10.3662 <sub>6</sub> | -0.32226  |
| H375 | H  | 0.51148 | 0.43094 | 0.4058  | 13.0427 <sub>4</sub> | 10.9889 <sub>7</sub> | 10.3479              | -0.269665 |
| H376 | H  | 0.58338 | 0.6058  | 0.5907  | 14.8761 <sub>9</sub> | 15.4479              | 15.0628 <sub>5</sub> | -0.327951 |
| H377 | H  | 0.59909 | 0.42277 | 0.60415 | 15.2768              | 10.7806 <sub>4</sub> | 15.4058 <sub>3</sub> | -0.331057 |
| H378 | H  | 0.40031 | 0.58996 | 0.58569 | 10.2079 <sub>1</sub> | 15.0439 <sub>8</sub> | 14.9351              | -0.32971  |
| H379 | H  | 0.40155 | 0.48648 | 0.43806 | 10.2395 <sub>3</sub> | 12.4052 <sub>4</sub> | 11.1705 <sub>3</sub> | -0.275428 |
| H380 | H  | 0.41559 | 0.40618 | 0.59903 | 10.5975 <sub>5</sub> | 10.3575 <sub>9</sub> | 15.2752 <sub>7</sub> | -0.331851 |
| H381 | H  | 0.42215 | 0.39274 | 0.41572 | 10.7648 <sub>3</sub> | 10.0148 <sub>7</sub> | 10.6008 <sub>6</sub> | -0.328285 |
| H382 | H  | 0.39916 | 0.49531 | 0.56127 | 10.1785 <sub>8</sub> | 12.6304 <sub>1</sub> | 14.3123 <sub>9</sub> | -0.274799 |
| H383 | H  | 0.55548 | 0.60633 | 0.49693 | 14.1647 <sub>4</sub> | 15.4614 <sub>2</sub> | 12.6717 <sub>2</sub> | -0.284649 |
| H384 | H  | 0.49394 | 0.56908 | 0.60209 | 12.5954 <sub>7</sub> | 14.5115 <sub>4</sub> | 15.3533              | -0.275858 |
| H385 | H  | 0.43231 | 0.59739 | 0.49268 | 11.0239 <sub>1</sub> | 15.2334 <sub>5</sub> | 12.5633 <sub>4</sub> | -0.276609 |
| H386 | H  | 0.60941 | 0.5044  | 0.44342 | 15.5399 <sub>6</sub> | 12.8622              | 11.3072 <sub>1</sub> | -0.272049 |
| H387 | H  | 0.60077 | 0.51272 | 0.56648 | 15.3196 <sub>4</sub> | 13.0743 <sub>6</sub> | 14.4452 <sub>4</sub> | -0.273154 |
| H388 | H  | 0.60617 | 0.4098  | 0.4208  | 15.4573 <sub>4</sub> | 10.4499              | 10.7304              | -0.328892 |
| H389 | H  | 0.5009  | 0.55358 | 0.39459 | 12.7729 <sub>5</sub> | 14.1162 <sub>9</sub> | 10.0620 <sub>5</sub> | -0.280963 |
| H390 | H  | 0.40648 | 0.57648 | 0.40121 | 10.3652 <sub>4</sub> | 14.7002 <sub>4</sub> | 10.2308 <sub>6</sub> | -0.324055 |
| H391 | H  | 0.44923 | 0.39002 | 0.50904 | 11.4553 <sub>7</sub> | 9.94551              | 12.9805 <sub>2</sub> | -0.274855 |
| H392 | H  | 0.50424 | 0.44602 | 0.60813 | 12.8581 <sub>2</sub> | 11.3735 <sub>1</sub> | 15.5073 <sub>2</sub> | -0.272913 |

**Table S6.** Parameters obtained from TCSPC measurement

| <b>Component</b> | <b><math>\tau</math> (ns)</b> | <b><math>A</math></b> | <b><math>f</math></b> |
|------------------|-------------------------------|-----------------------|-----------------------|
| 1                | 5855                          | 0.007                 | 0.715                 |
| 2                | 8.90                          | 0.98                  | 0.147                 |
| 3                | 596                           | 0.013                 | 0.137                 |

Fitting parameter  $\chi^2$  is 1.12,  $\tau$  is the lifetime of each individual component,  $A$  is the amplitude and  $f$  determine the fractional population of each component.

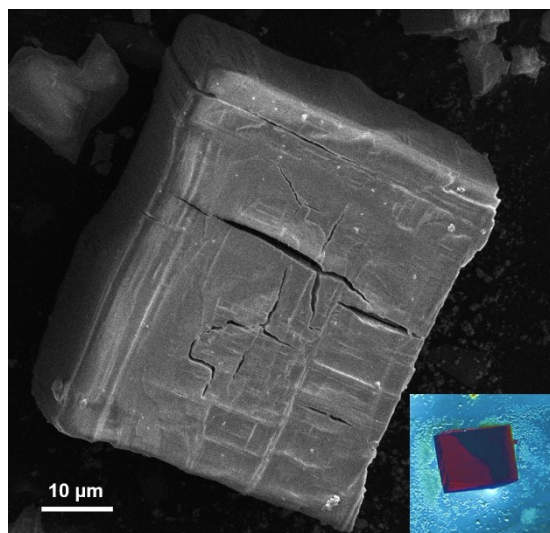

**Fig. S1** SEM and optical microscope image of Cu<sub>58</sub> NC crystal.

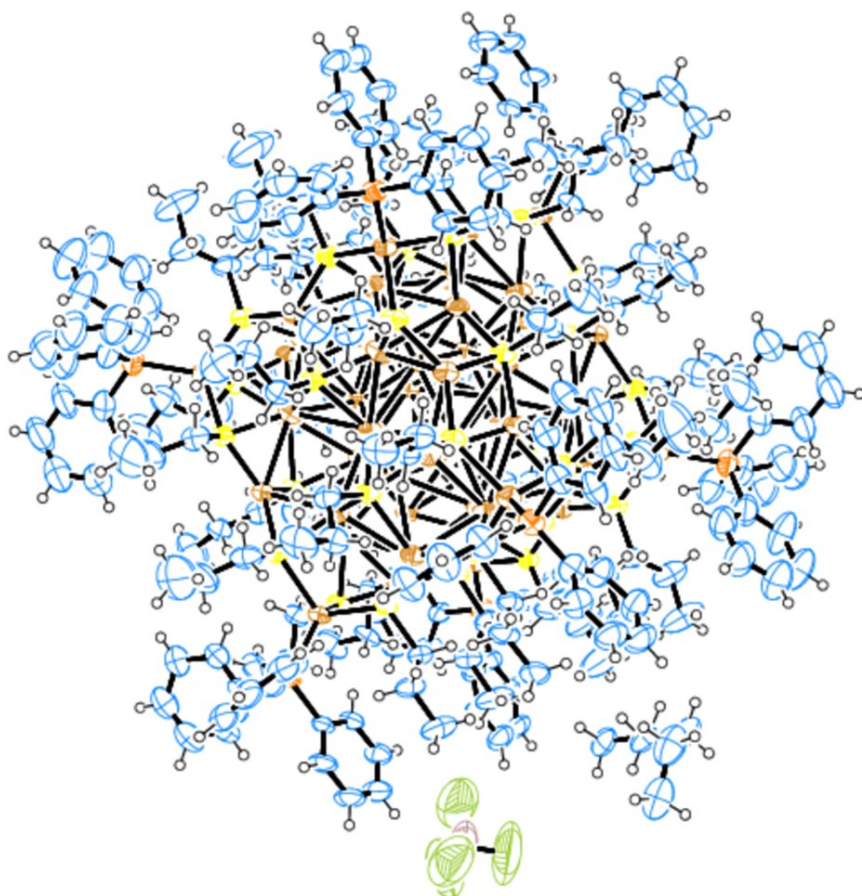

**Fig. S2** Thermal ellipsoid (50%) of all atoms present in Cu<sub>58</sub> NC.

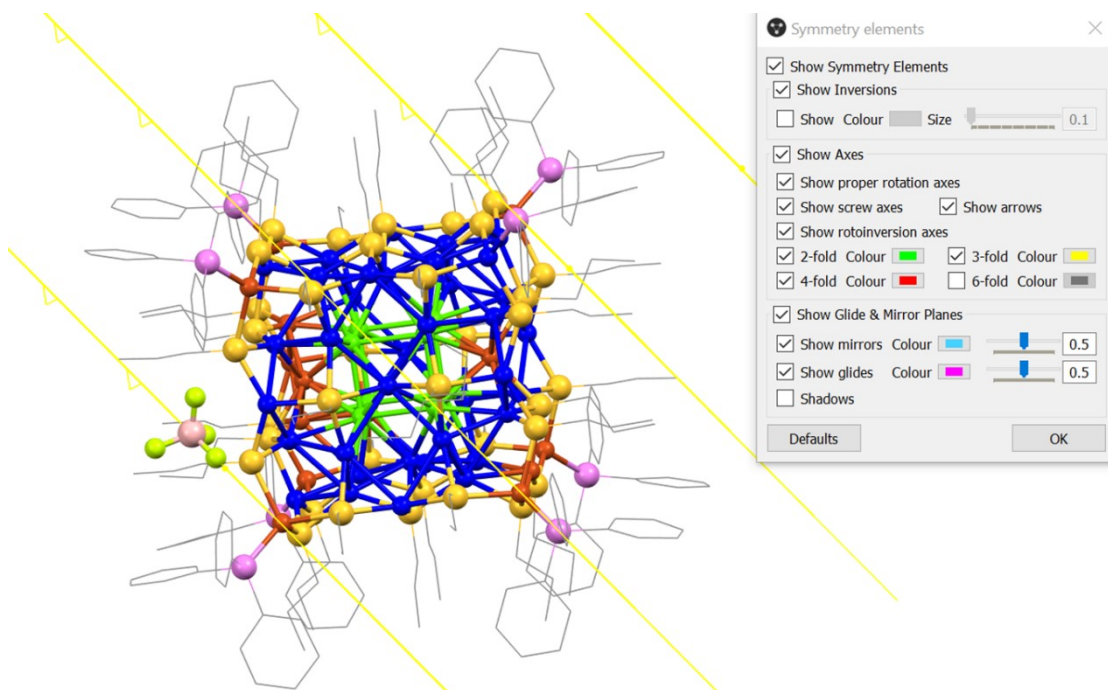

**Fig. S2** Symmetry elements of  $\text{Cu}_{58}\text{NC}$ . Color legend: Cu, light green, blue and brown; S, yellow; P, violet; B, pink; F, yellowish-green; C, grey stick; H atoms are omitted.

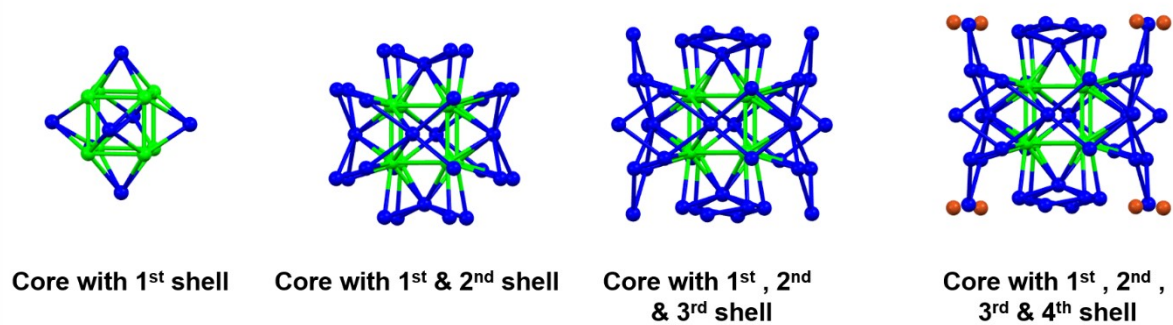

**Fig. S4** Connections and among the layers of Cu atoms and their positions in Cu<sub>58</sub> NC. Color legend: Cu, light green, blue and brown.

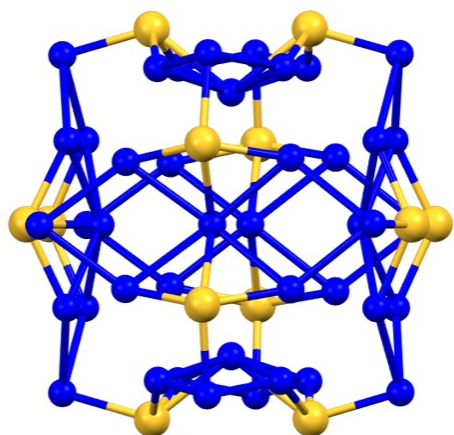

**Connection among middle layers**

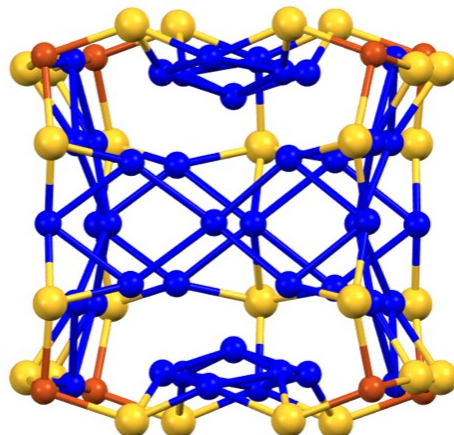

**Connection among middle & outermost layers**

**Fig. S5** Bridging among the shell layers in  $\text{Cu}_{58}$  NC. Color legend: Cu, blue and brown; S, yellow.

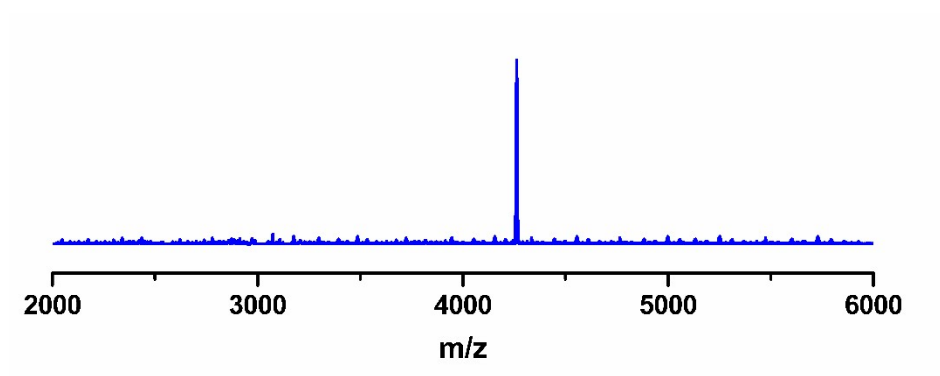

**Fig. S6** ESI mass spectrum of  $\text{Cu}_{58}\text{D}$  nanocluster.

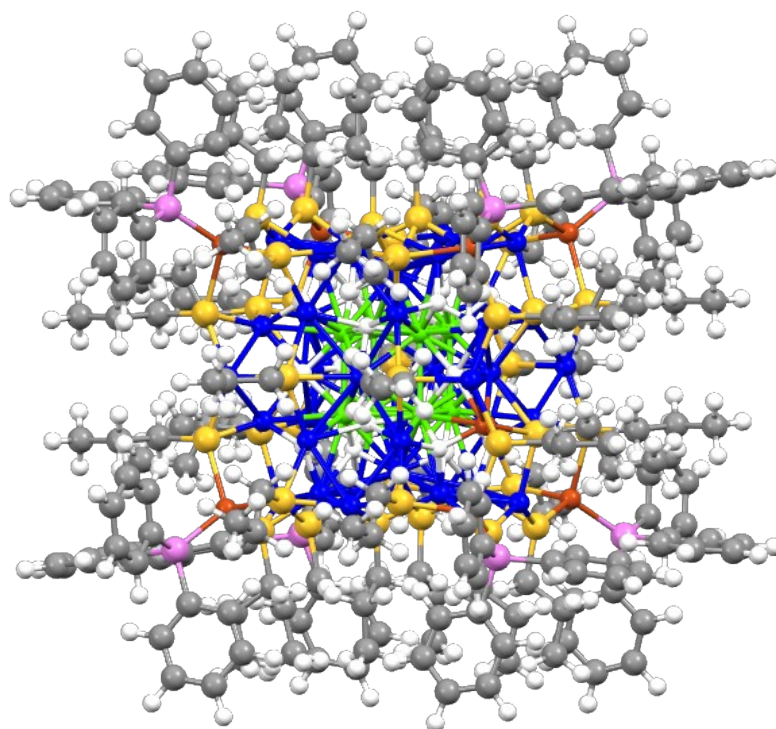

**Fig. S7** DFT-optimized structure of the  $\text{Cu}_{58}$  NC after placing the 20 hydrides into the X-ray structure (the sites to place hydrides were predicted from machine learning; see Fig. S8). Color legend: Cu, light green, blue and brown; S, yellow; P, violet; C, grey; H, white.

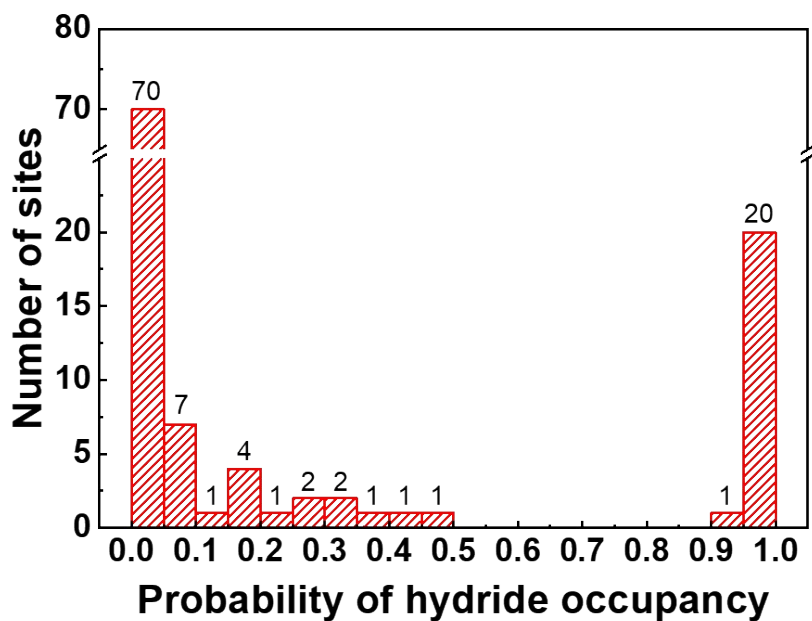

**Fig. S8** Probability of hydride occupancy in the  $\text{Cu}_{58}$  NC predicted by our machine learning model. The plot shows very distinctly that there are 21 sites whose hydride occupancies are close to 1. After symmetry consideration, we eliminated one site (being the center of the cluster) from the 21 sites; the remaining 20 hydrides form the most probable configuration. After placing the 20 hydrides according to the most probable configuration into the X-ray structure, we performed DFT geometry optimization of the total structure and found very minimal disturbance to the X-ray structure.

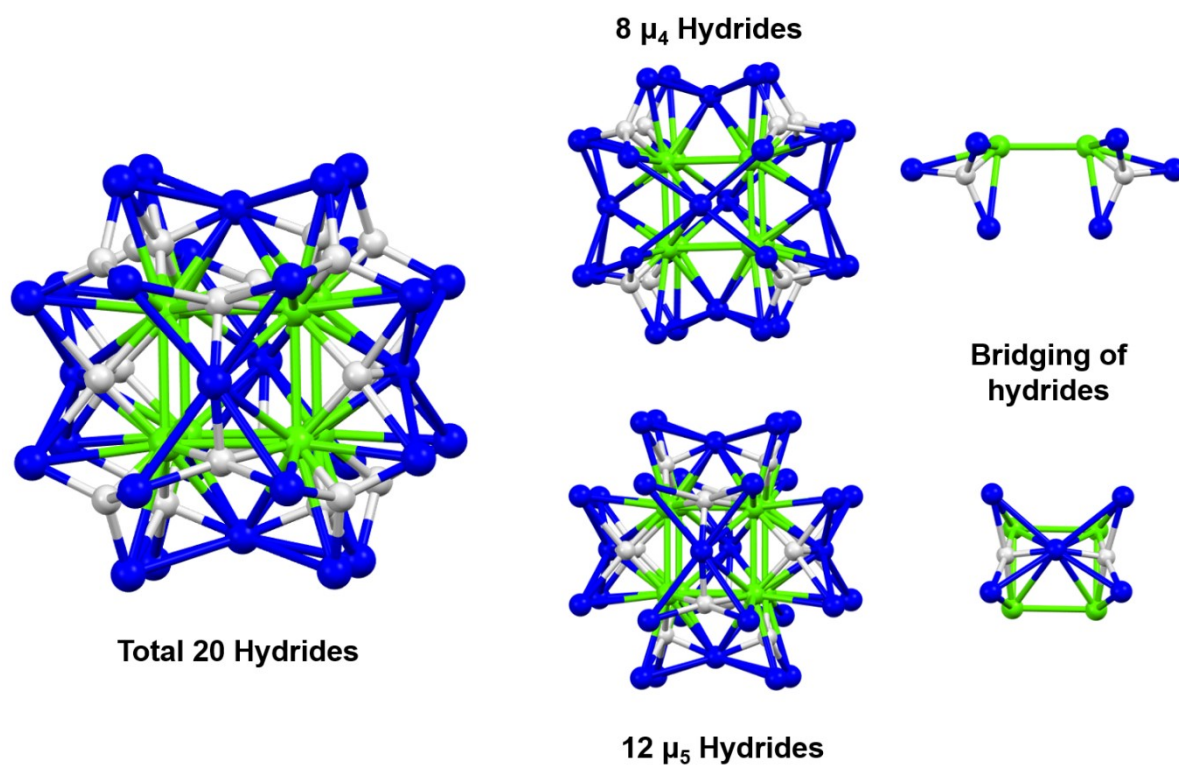

**Fig. S9** Position of hydrides inside the Cu<sub>58</sub> NC and their bridging mode. Color legend: Cu, light green, blue; H, white.

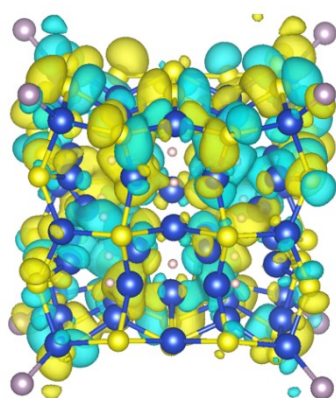

**HOMO**

**-1.5263 eV**

**Triple degenerate**

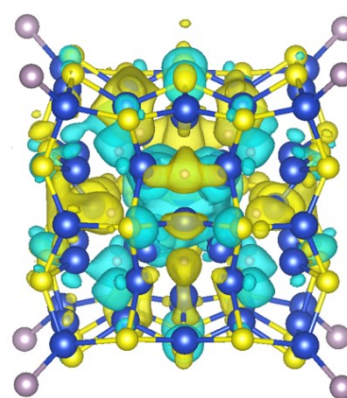

**LUMO**

**-0.0045 eV**

**Non-degenerate**

**Fig. S10** Orbital arrangements of HOMO and LUMO.

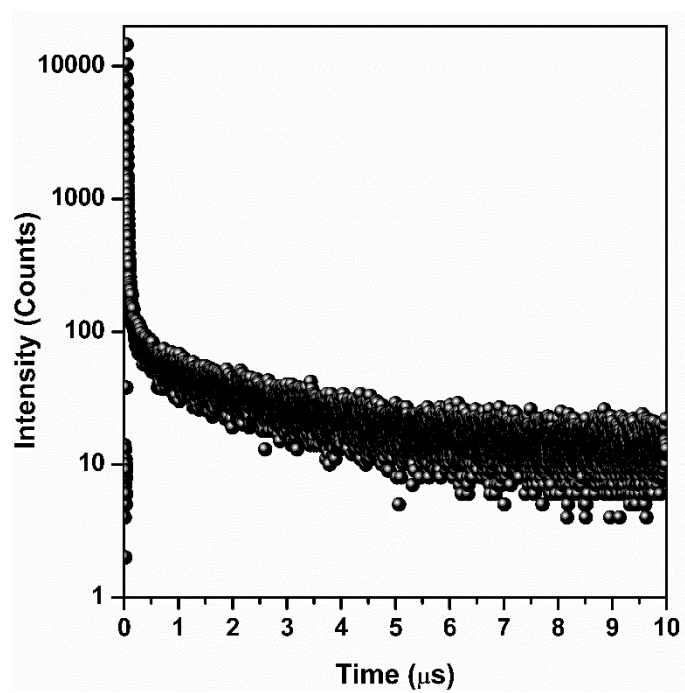

**Fig. S11** TCSPC Lifetime of the emission of Cu<sub>58</sub> NC in CHCl<sub>3</sub> solution.

## References

- S1. G. M. Sheldrick, *Acta Crystallogr., Sect. C: Struct. Chem.* 2015, **71**, 3–8.
- S2. Bruker APEX3, v2019.1–0, Bruker AXS Inc., Madison, WI, USA, (2019).
- S3. O. V. Dolomanov, L. J. Bourhis, R. J. Gildea, J. A. K. Howard, and H. Puschmann, *J. Appl. Crystallogr.* 2009, **42**, 339–341.
- S4. S. Wang, T. Liu, D.-e. Jiang, Locating Hydrides in Ligand-Protected Copper Nanoclusters by Deep Learning. *ACS Appl. Mater. Interfaces* 2021, **13**, 53468–53474.
- S5. S. Wang, Z. Wu, S. Dai, et al., Deep Learning Accelerated Determination of Hydride Locations in Metal Nanoclusters. *Angew. Chem., Int. Ed.* 2021, **60**, 12289–12292.
- S6. J. P. Perdew, K. Burke, M. Ernzerhof, Generalized Gradient Approximation Made Simple. *Phys. Rev. Lett.* 1996, **77**, 3865.
- S7. P E. Blöchl, Projector Augmented-Wave Method. *Phys. Rev. B*, 1994, **50**, 17953.
